# Supplementary material for: Microbiome Assembly across Multiple Body Sites in Low-Birthweight Infants
Source: PubMed Central journal article supplement — mBio. 2013 Oct 29;4(6):e00782-13. doi: 10.1128/mBio.00782-13 (PMC3809564; doi:10.1128/mbio.00782-13), 2013-10-29
Supplement: mbo005131648sf01.pdf [file mbo005131648sf01.pdf]

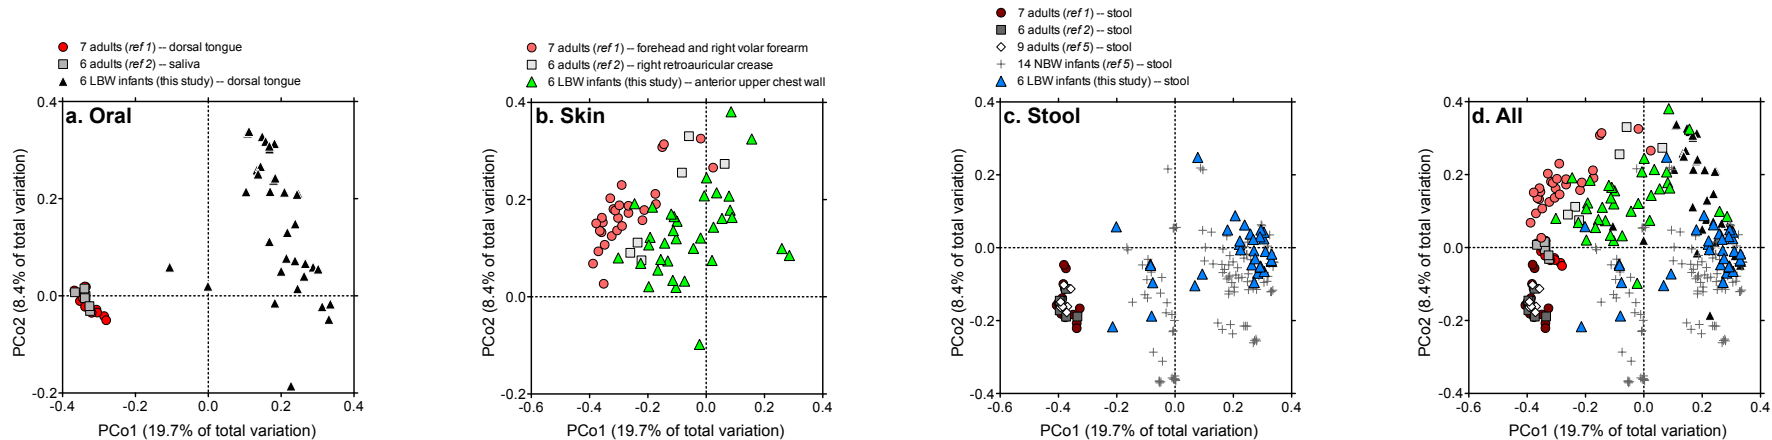

**Supplemental Figure S1.** Unweighted UniFrac-based principal coordinates analysis (PCoA) of infant- and adult-associated bacterial communities profiled using 16S rRNA gene sequence surveys. Each point corresponds to a sample colored according to cohort and body site. Sites include the (a) oral cavity, (b) skin surface, and (c) distal gut (stool samples). Panels a-d represent the same analysis; a, b and c display each site individually and are overlaid in d. The percentage of the total variation explained by the plotted principal coordinate (PCO) is indicated on the axis. The OTU table was rarefied to 250 sequences/sample prior to analysis. See Materials and Methods for details on the selection of samples from published studies. In c, the 6 LBW infant samples clustering nearest to the adult samples are from *Bacteroides*-dominated baby 6.
