# Supplementary material for: Microbiome Assembly across Multiple Body Sites in Low-Birthweight Infants
Source: PubMed Central journal article supplement — mBio. 2013 Oct 29;4(6):e00782-13. doi: 10.1128/mBio.00782-13 (PMC3809564; doi:10.1128/mbio.00782-13), 2013-10-29
Supplement: mbo005131648sf03.pdf [file mbo005131648sf03.pdf]

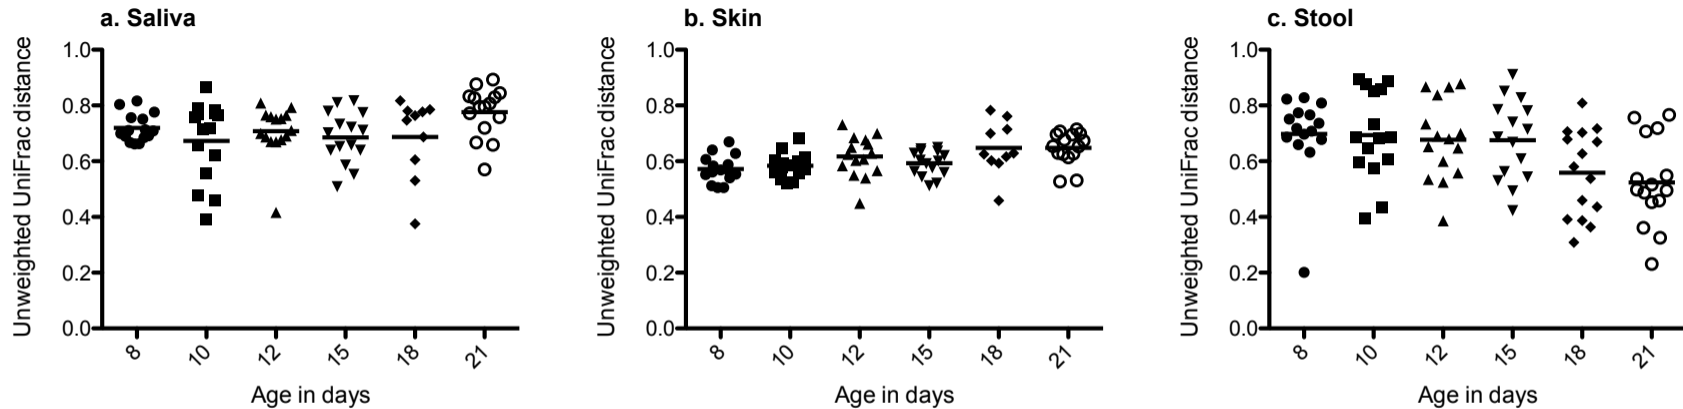

**Supplemental Figure S3.** Inter-subject compositional variation plotted against infant age for each body site. Each point corresponds to a between-subject UniFrac distance. Bars represent means. Skin microbiota composition is least personalized on day 8; stool microbiota composition becomes slightly less personalized over time.
